# Supplementary material
Source: publisher figshare collection journal article supplement (https://frontiersin.figshare.com/ndownloader/files/30715331)
Supplement: Supplementary file [file 30715331]

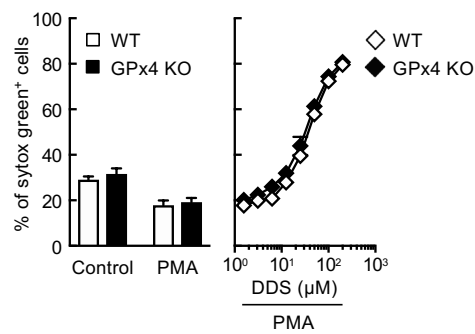

**Figure S1. GPx4 is not involved in the regulation of NET induction.** WT or LysM-Cre-GPx4<sup>flox/flox</sup> mice were injected peritoneally with 3% thioglycolate. Twenty-four hours later, neutrophils were purified from peritoneal excluded cell. Cells were stimulated with 1  $\mu$ M PMA in the presence or absence of DDS (3-200  $\mu$ M) for 2.5 hours. Cells were stained with SYTOX Green and Hoechst 33342. The proportion of NETosis was determined by counting the number of SYTOX Green<sup>+</sup> cells using a high-content analysis system. Average values and s.d. of triplicate samples in a single experiment are shown. Representative data of two independent experiments are shown.

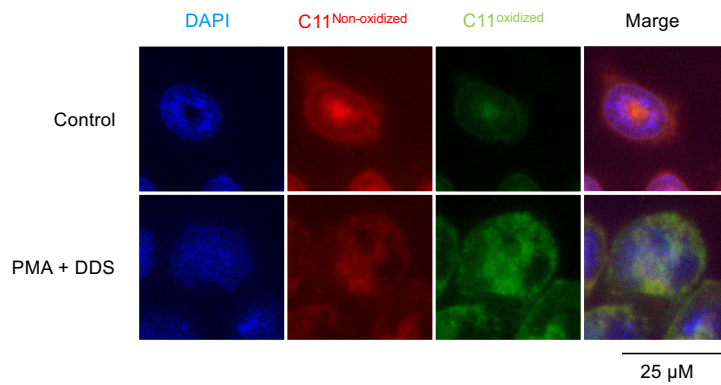

**Figure S2. Oxidized lipids were accumulated in plasma membrane and around nuclear region of neutrophils undergoing NETosis.** Mouse bone marrow neutrophils were stimulated with 1  $\mu$ M PMA + 200  $\mu$ M DDS for 1.5 hours. BODIPY 581/591 C11 (2 $\mu$ M) was added to the cells for 30 minutes. Images were acquired using a Keyence BZ-X710 fluorescent microscope and images were analyzed using the BZ-X analyzer. Representative images of two independent experiments are shown.

# Figure. S1

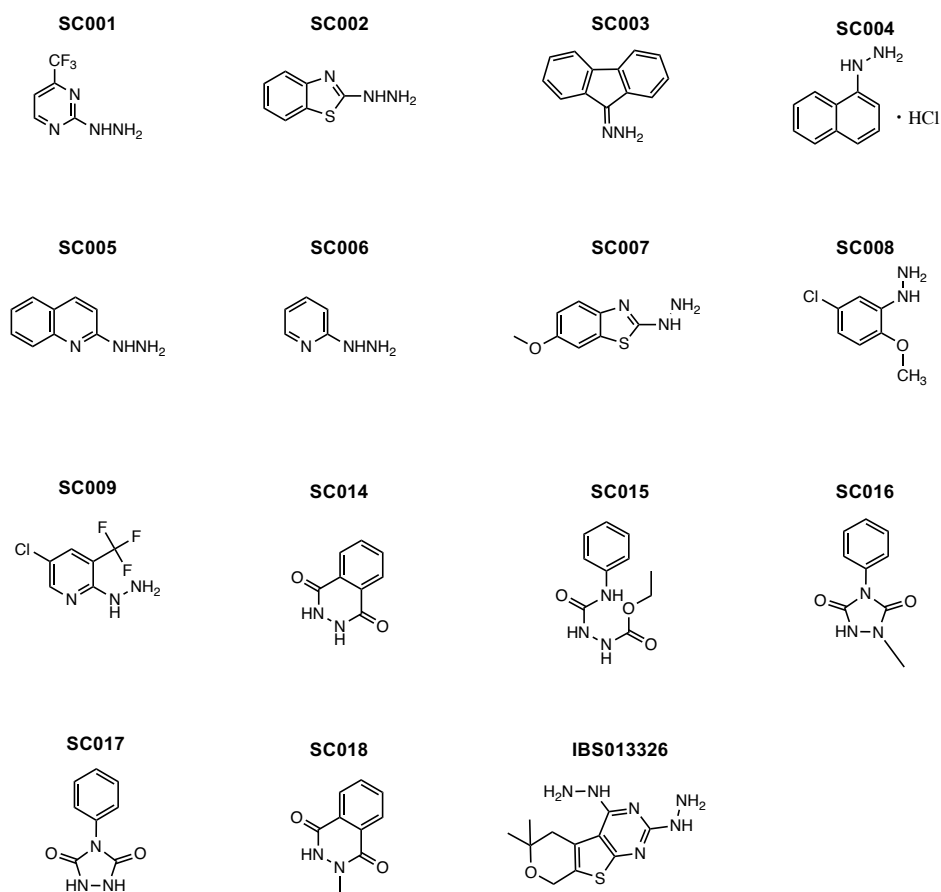

**Figure S3.** Structure of compounds containing hydrazine moiety.

# Figure. S2

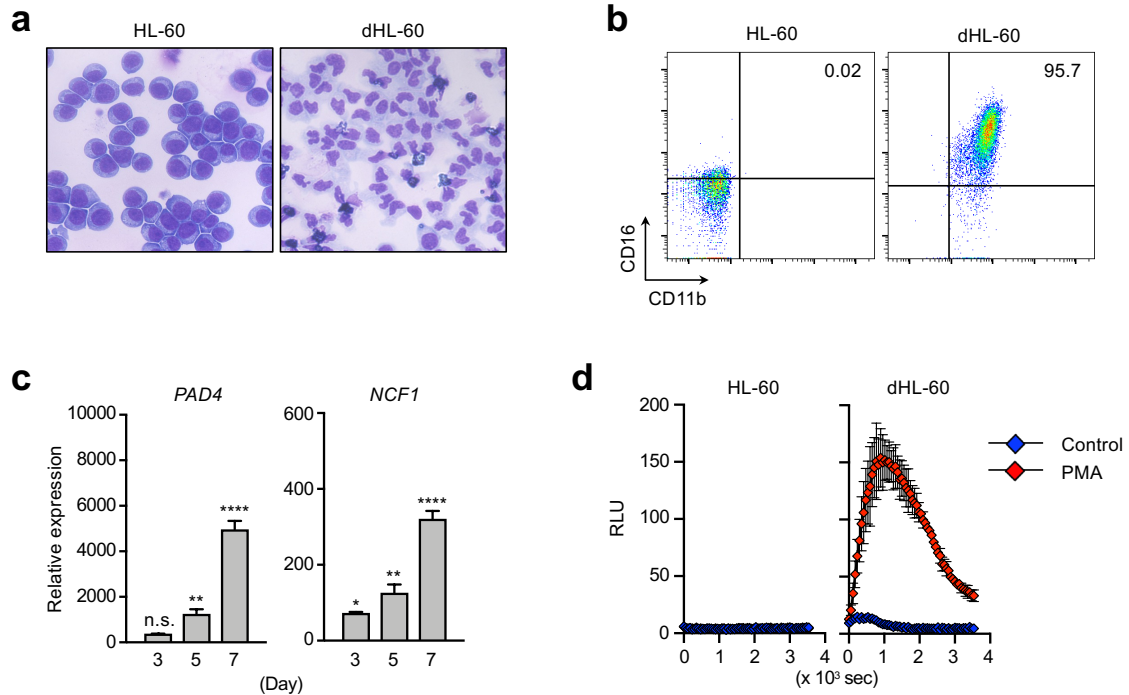

**Figure S4. Characterization of DMSO-differentiated HL-60.** (a–d) HL-60 cells were cultured for 7 days in the presence or absence of 1.25 % DMSO. The cells stained with Diff-Quick Stain Set. A representative images from two independent experiments are shown (a). Expression of surface CD11b and CD16 on HL-60 or DMSO-differentiated HL-60. Quadrants were established using appropriate isotype control antibodies. (B). mRNA expression levels of *PAD4* and *NCF1* were determined by qRT-PCR and are shown as fold change relative to that of DMSO-untreated HL-60. One-way ANOVA, \* $P < 0.05$ , \*\* $P < 0.01$ , \*\*\*\* $P < 0.001$ , n.s., not significant (d). Extracellular ROS production of HL-60 or DMSO-differentiated HL-60 stimulated with 100 nM PMA as measured by the lucigenin-amplified chemiluminescence assay. Average values and s.d. of triplicate samples in a single experiment are shown. Data are representative of two independent experiments (d).
